# Supplementary material
Source: PubMed Central journal article supplement (PMC2644127)
Supplement: 0808434106_0808434106SI.pdf [file 0808434106_0808434106SI.pdf]

# Supporting Information

Feng et al. 10.1073/pnas.0808434106

**Table S1. Background information on the 15 sample populations of *Ageratina adenophora***

| Site                              | Country | Latitude (N) | Longitude | Altitude, m | Plant height, cm | Habitat                            |
|-----------------------------------|---------|--------------|-----------|-------------|------------------|------------------------------------|
| Umécuaro, Morelia, Michoacán      | Mexico  | 19°42'       | W101°11'  | 2,700       | 50–70            | Evergreen forest                   |
| Queréndaro, Michoacán             | Mexico  | 19°52'       | W100°54'  | 2,300       | 50–70            | Pine, holm oak                     |
| Acebuche, Tarimoro, Jalisco       | Mexico  | 20°25'       | W102°10'  | 2,250       | 50–70            | Evergreen forest                   |
| Pinal de Amoles, Querétaro        | Mexico  | 20°35'       | W100°23'  | 1,830       | 50–70            | Pine, oak, prickly thicket         |
| San Miguel de Allende, Guanajuato | Mexico  | 20°55'       | W100°45'  | 1,900       | 50–70            | Prickly Thicket                    |
| Menglun, Mengla, Yunnan           | China   | 21°58'       | E101°13'  | 640         | 80–100           | Crop fields                        |
| Taizhong, Jingdong, Yunnan        | China   | 24°28'       | E100°55'  | 1,610       | > 100            | Evergreen forest                   |
| Tailzhong, Jingdong, Yunnan       | China   | 24°29'       | E100°59'  | 1,950       | > 100            | Evergreen forest                   |
| Xujiaba, Jingdong, Yunnan         | China   | 24°31'       | E101°00'  | 2,310       | 80–100           | Evergreen forest                   |
| Kunming, Yunnan                   | China   | 25°06'       | E102°50'  | 2,200       | > 100            | Secondary forest                   |
| Mussoorie Road, Uttrakhand        | India   | 30°25'       | E78° 4'   | 1,600       | 80–100           | Hilly slope                        |
| Mussoorie Road, Uttrakhand        | India   | 30°25'       | E78°44'   | 1,600       | 80–100           | Hilly slope                        |
| Mussoorie, Uttrakhand             | India   | 30°26'       | E78°44'   | 1,825       | > 100            | Broadleaved sclerophyllous forests |
| Mussoorie, Uttrakhand             | India   | 30°26'       | E78°41'   | 1,825       | > 100            | Broadleaved sclerophyllous forests |
| Mussoorie, Uttrakhand             | India   | 30°26'       | E78°41'   | 1,825       | > 100            | Broadleaved sclerophyllous forest  |
